# Supplementary material for: Recovery of tyrosol from aqueous streams using hydrophobic ionic liquids: a first step towards developing sustainable processes for olive mill wastewater (OMW) management
Source: Royal Society of Chemistry journal article supplement (doi:10.1039/c5ra26510j), 2016-01-01
Supplement: c5ra26510j1.pdf [file c5ra26510j1.pdf]

## ELECTRONIC SUPPLEMENTARY INFORMATION

### Recovery of tyrosol from aqueous streams using hydrophobic ionic liquids: A first step towards developing sustainable processes for olive mill wastewater (OMW) management

Marcos Larriba, Salama Omar, Pablo Navarro, Julián García, Francisco Rodríguez, Maria Gonzalez-Miquel

**Table S1** Experimental extraction efficiencies ( $E$ ) in the extraction of tyrosol from water as a function of temperature ( $T$ ), solvent to feed ratio ( $S/F$ ) and the addition of sodium salts using the  $[P_{4441}][Tf_2N]$  as extraction solvent.

| $T / K$ | $S/F$ (in vol.) | Salt Added               | $E / \%$   |
|---------|-----------------|--------------------------|------------|
| 303.2   | 1.0             | -                        | 43.2 ± 0.9 |
|         | 2.5             | -                        | 62.7 ± 1.2 |
|         | 5.0             | -                        | 76.9 ± 1.5 |
|         | 1.0             | NaCl (5 % wt.)           | 48.8 ± 1.5 |
|         | 2.5             | NaCl (5 % wt.)           | 67.8 ± 1.9 |
|         | 5.0             | NaCl (5 % wt.)           | 80.2 ± 2.3 |
|         | 1.0             | NaCl (10 % wt.)          | 58.2 ± 1.7 |
|         | 2.5             | NaCl (10 % wt.)          | 76.9 ± 2.3 |
|         | 5.0             | NaCl (10 % wt.)          | 88.8 ± 2.6 |
|         | 1.0             | NaCl (20 % wt.)          | 74.2 ± 2.0 |
|         | 2.5             | NaCl (20 % wt.)          | 87.2 ± 2.5 |
|         | 5.0             | NaCl (20 % wt.)          | 94.3 ± 2.8 |
|         | 1.0             | NaAcetate (10 % wt.)     | 45.9 ± 1.3 |
|         | 1.0             | NaThiosulfate (10 % wt.) | 39.8 ± 1.1 |
|         | 313.2           | 1.0                      | -          |
| 2.5     |                 | -                        | 63.7 ± 1.3 |
| 5.0     |                 | -                        | 77.8 ± 1.4 |
| 323.2   | 1.0             | -                        | 43.8 ± 0.8 |
|         | 2.5             | -                        | 64.3 ± 1.4 |
|         | 5.0             | -                        | 78.8 ± 1.6 |

**Table S2** Experimental extraction efficiencies ( $E$ ) in the extraction of tyrosol from water as a function of temperature ( $T$ ), solvent to feed ratio ( $S/F$ ) and the addition of sodium salts using the  $[N_{4441}][Tf_2N]$  as extraction solvent.

| $T / K$ | $S/F$ (in vol.) | Salt Added               | $E / \%$       |
|---------|-----------------|--------------------------|----------------|
| 303.2   | 1.0             | -                        | $44.6 \pm 0.8$ |
|         | 2.5             | -                        | $63.3 \pm 1.2$ |
|         | 5.0             | -                        | $72.8 \pm 1.5$ |
|         | 1.0             | NaCl (5 % wt.)           | $46.9 \pm 1.4$ |
|         | 2.5             | NaCl (5 % wt.)           | $68.5 \pm 2.0$ |
|         | 5.0             | NaCl (5 % wt.)           | $77.5 \pm 2.3$ |
|         | 1.0             | NaCl (10 % wt.)          | $56.8 \pm 1.7$ |
|         | 2.5             | NaCl (10 % wt.)          | $74.7 \pm 2.2$ |
|         | 5.0             | NaCl (10 % wt.)          | $84.6 \pm 2.4$ |
|         | 1.0             | NaCl (20 % wt.)          | $74.7 \pm 2.2$ |
|         | 2.5             | NaCl (20 % wt.)          | $87.0 \pm 2.6$ |
|         | 5.0             | NaCl (20 % wt.)          | $93.3 \pm 2.7$ |
|         | 1.0             | NaAcetate (10 % wt.)     | $48.7 \pm 1.5$ |
|         | 1.0             | NaThiosulfate (10 % wt.) | $43.2 \pm 1.2$ |
|         | 313.2           | 1.0                      | -              |
| 2.5     |                 | -                        | $64.1 \pm 1.3$ |
| 5.0     |                 | -                        | $74.4 \pm 1.3$ |
| 323.2   | 1.0             | -                        | $45.5 \pm 0.8$ |
|         | 2.5             | -                        | $64.9 \pm 1.3$ |
|         | 5.0             | -                        | $77.6 \pm 1.5$ |

**Table S3** Experimental extraction efficiencies ( $E$ ) in the extraction of tyrosol from water as a function of temperature ( $T$ ), solvent to feed ratio ( $S/F$ ) and the addition of sodium salts using the  $[N_{8881}][Tf_2N]$  as extraction solvent.

| $T / K$ | $S/F$ (in vol.) | Salt Added               | $E / \%$       |
|---------|-----------------|--------------------------|----------------|
| 303.2   | 1.0             | -                        | $24.0 \pm 0.4$ |
|         | 2.5             | -                        | $37.1 \pm 0.7$ |
|         | 5.0             | -                        | $46.5 \pm 0.9$ |
|         | 1.0             | NaCl (5 % wt.)           | $28.3 \pm 0.8$ |
|         | 2.5             | NaCl (5 % wt.)           | $48.5 \pm 1.5$ |
|         | 5.0             | NaCl (5 % wt.)           | $59.7 \pm 1.8$ |
|         | 1.0             | NaCl (10 % wt.)          | $39.3 \pm 1.1$ |
|         | 2.5             | NaCl (10 % wt.)          | $57.7 \pm 1.7$ |
|         | 5.0             | NaCl (10 % wt.)          | $67.6 \pm 2.0$ |
|         | 1.0             | NaCl (20 % wt.)          | $54.9 \pm 1.7$ |
|         | 2.5             | NaCl (20 % wt.)          | $65.1 \pm 1.8$ |
|         | 5.0             | NaCl (20 % wt.)          | $73.1 \pm 2.0$ |
|         | 1.0             | NaAcetate (10 % wt.)     | $33.7 \pm 1.0$ |
|         | 1.0             | NaThiosulfate (10 % wt.) | $20.9 \pm 0.5$ |
|         | 313.2           | 1.0                      | -              |
| 2.5     |                 | -                        | $38.7 \pm 0.7$ |
| 5.0     |                 | -                        | $50.3 \pm 1.0$ |
| 323.2   | 1.0             | -                        | $24.8 \pm 0.5$ |
|         | 2.5             | -                        | $40.0 \pm 0.7$ |
|         | 5.0             | -                        | $53.9 \pm 0.9$ |

**Table S4** Densities ( $\rho$ ) and dynamic viscosities ( $\eta$ ) of [P<sub>4441</sub>][Tf<sub>2</sub>N], [N<sub>4441</sub>][Tf<sub>2</sub>N], and [N<sub>8881</sub>][Tf<sub>2</sub>N] ILs as a function of temperature at  $P = 0.1$  MPa.<sup>a</sup>

| $T/$ K | $\rho/$ g.cm <sup>-3</sup>              |                                         |                                         |
|--------|-----------------------------------------|-----------------------------------------|-----------------------------------------|
|        | [P <sub>4441</sub> ][Tf <sub>2</sub> N] | [N <sub>4441</sub> ][Tf <sub>2</sub> N] | [N <sub>8881</sub> ][Tf <sub>2</sub> N] |
| 288.15 | 1.26251                                 | 1.26940                                 | 1.11460                                 |
| 293.15 | 1.25834                                 | 1.26518                                 | 1.11088                                 |
| 298.15 | 1.25417                                 | 1.26093                                 | 1.10706                                 |
| 303.15 | 1.24999                                 | 1.25667                                 | 1.10333                                 |
| 308.15 | 1.24580                                 | 1.25262                                 | 1.09962                                 |
| 313.15 | 1.24163                                 | 1.24845                                 | 1.09590                                 |
| 318.15 | 1.23747                                 | 1.24428                                 | 1.09219                                 |
| 323.15 | 1.23332                                 | 1.24011                                 | 1.08847                                 |
| 328.15 | 1.22918                                 | 1.23595                                 | 1.08475                                 |
| 333.15 | 1.22511                                 | 1.23185                                 | 1.08108                                 |
|        | $\eta/$ mPa.s                           |                                         |                                         |
|        | [P <sub>4441</sub> ][Tf <sub>2</sub> N] | [N <sub>4441</sub> ][Tf <sub>2</sub> N] | [N <sub>8881</sub> ][Tf <sub>2</sub> N] |
| 288.15 | 403.8                                   | 1058.0                                  | 1084.0                                  |
| 293.15 | 288.7                                   | 748.8                                   | 786.7                                   |
| 298.15 | 210.8                                   | 505.8                                   | 540.8                                   |
| 303.15 | 157.4                                   | 350.2                                   | 396.4                                   |
| 308.15 | 119.3                                   | 249.1                                   | 296.0                                   |
| 313.15 | 92.08                                   | 180.6                                   | 223.6                                   |
| 318.15 | 71.75                                   | 134.6                                   | 170.6                                   |
| 323.15 | 56.41                                   | 101.7                                   | 132.2                                   |
| 328.15 | 45.47                                   | 77.74                                   | 103.4                                   |
| 333.15 | 37.94                                   | 58.72                                   | 82.29                                   |

<sup>a</sup> Standard uncertainties  $u$  are  $u(T) = 0.01$  K,  $u(P) = 1$  kPa,  $u(\rho) = 0.00008$  g.cm<sup>-3</sup>,  $u(\eta) = 0.9$  %.
